# Supplementary material
Source: MDPI journal article supplement (https://www.mdpi.com/2073-4433/7/5/62)

# Supplementary Materials: Examining the Impacts of Land Use on Air Quality from a Spatio-Temporal Perspective in Wuhan, China. *Atmosphere* 2016, 7, doi:10.3390/atmos7050062

Gang Xu, Limin Jiao, Suli Zhao, Man Yuan, Xiaoming Li, Yuyao Han, Boen Zhang and Ting Dong

**Table S1.** Detailed description of nine ambient air quality monitoring sites in Wuhan.

| No. | Site Name        | Location                  | District                                                    | Functional Zone                          |
|-----|------------------|---------------------------|-------------------------------------------------------------|------------------------------------------|
| 1   | Hankou jiangtan  | Inside the 1st ring road  | Jiang' an district<br>(64 km <sup>2</sup> , urban area)     | Scenery zone,<br>Transportation zone     |
| 2   | Hankou huaqiao   | Near the 2nd ring road    | Jiang' an district<br>(64 km <sup>2</sup> , urban area)     | Residential zone,<br>Transportation zone |
| 3   | Hanyang yuehu    | Near the 1st ring road    | Hanyang district<br>(108 km <sup>2</sup> , urban area)      | Scenery zone,<br>Transportation zone     |
| 4   | Wuchang ziyang   | Near the 1st ring road    | Wuchang district<br>(82 km <sup>2</sup> , urban area)       | Residential zone,<br>Transportation zone |
| 5   | Donghu liyuan    | Near the 2nd ring road    | Wuchang district<br>(82 km <sup>2</sup> , urban area)       | Scenery zone                             |
| 6   | Qingshan ganghua | Outside the 2nd ring road | Qingshan district<br>(61 km <sup>2</sup> , urban area)      | Industrial zone,<br>Transportation zone  |
| 7   | Wujiashan        | Outside the 3rd ring road | Dongxihu district<br>(495 km <sup>2</sup> , suburban area)  | Industrial zone,<br>Residential zone     |
| 8   | Zhuankou xinqu   | Outside the 3rd ring road | Caidian district<br>(1100 km <sup>2</sup> , suburban area)  | Industrial zone,<br>Residential zone     |
| 9   | Donghu gaoxin    | Near the 3rd ring road    | Jiangxia district<br>(2014 km <sup>2</sup> , suburban area) | Industrial zone,<br>Transportation zone  |

**Table S2.** Detailed information on satellite images used for land use information acquisition.

| Date         | Landsat No. | Imagery Type | Spatial Resolution (m) | Cloud Cover (%) |
|--------------|-------------|--------------|------------------------|-----------------|
| 2007         |             |              |                        |                 |
| 10 April     | Landsat-5   | TM           | 30                     | 0.10            |
| 31 July      | Landsat-5   | TM           | 30                     | 0.47            |
| 2008         |             |              |                        |                 |
| 28 April     | Landsat-5   | TM           | 30                     | 0.17            |
| 17 July      | Landsat-5   | TM           | 30                     | 18.75           |
| 2009         |             |              |                        |                 |
| 20 July      | Landsat-5   | TM           | 30                     | 12.57           |
| 06 September | Landsat-5   | TM           | 30                     | 0.06            |
| 2010         |             |              |                        |                 |
| 17 September | Landsat-7   | ETM          | 30                     | 0.00            |
| 03 October   | Landsat-7   | ETM          | 30                     | 2.00            |
| 2011         |             |              |                        |                 |
| 04 March     | Landsat-5   | TM           | 30                     | 0.00            |
| 08 June      | Landsat-5   | TM           | 30                     | 0.00            |
| 2012         |             |              |                        |                 |
| 17 May       | Landsat-7   | ETM          | 30                     | 0.03            |
| 2013         |             |              |                        |                 |
| 31 July      | Landsat-8   | OLI          | 30                     | 1.22            |
| 07 September | Landsat-8   | OLI          | 30                     | 0.12            |
| 2014         |             |              |                        |                 |
| 06 October   | Landsat-8   | OLI          | 30                     | 3.83            |
| 22 October   | Landsat-8   | OLI          | 30                     | 12.04           |

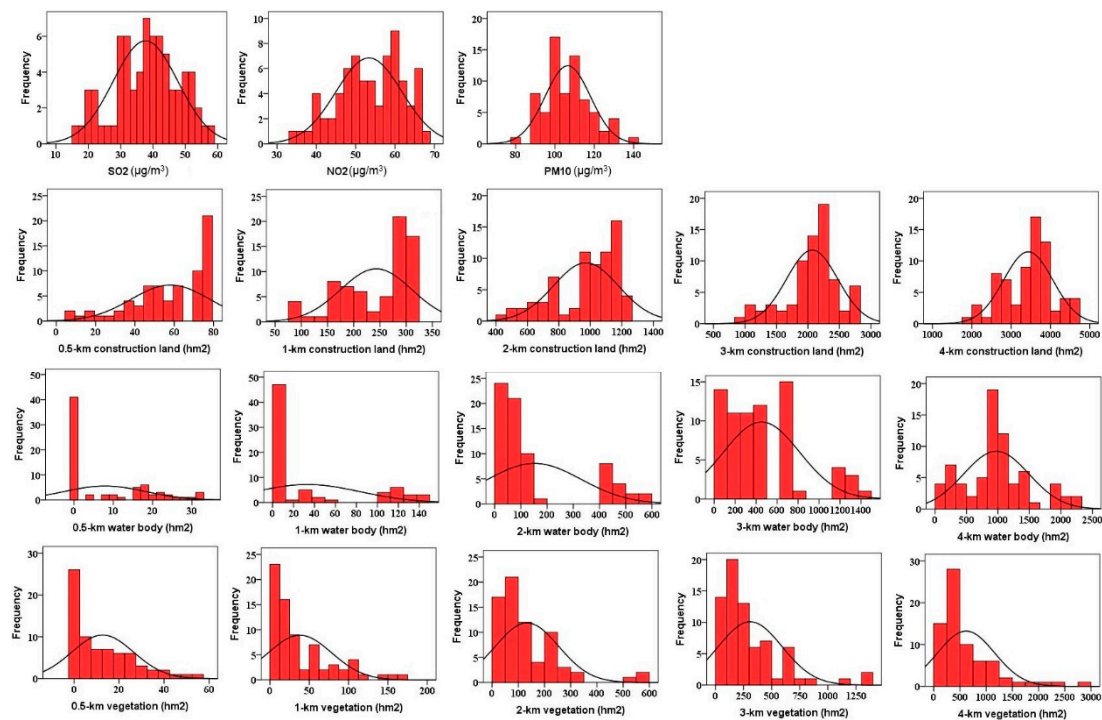

**Figure S1.** Frequency distribution histograms of air pollutants and land use variables.

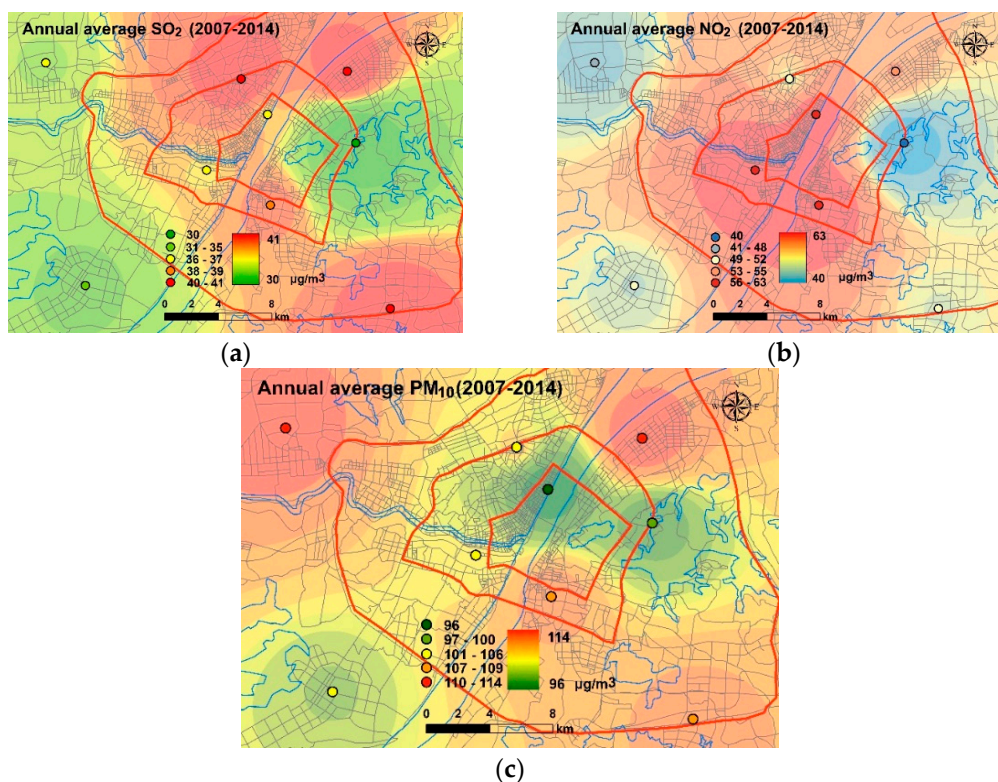

**Figure S2.** Spatial distribution of eight-year (2007–2014) average concentrations of three air pollutants in Wuhan based on IDW interpolation in ArcGIS10.1 with default parameters: (a) SO<sub>2</sub> concentration; (b) NO<sub>2</sub> concentration; (c) PM<sub>10</sub> concentration.

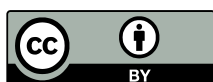

Supplement: s1 [file s1]
